# Supplementary material for: Obstructive Sleep Apnea–Induced Hypertension Is Associated With Increased Gut and Neuroinflammation
Source: PubMed Central journal article supplement — J Am Heart Assoc. 2023 Jun 1;12(11):e029218. doi: 10.1161/JAHA.122.029218 (PMC10381979; doi:10.1161/jaha.122.029218), 2023-06-01
Supplement: JAH3-12-e029218-s001.pdf [file JAH3-12-e029218-s001.pdf]

# **SUPPLEMENTAL MATERIAL**

**Figure S1. Measures of alpha diversity from sham and OSA cecal microbiota.**

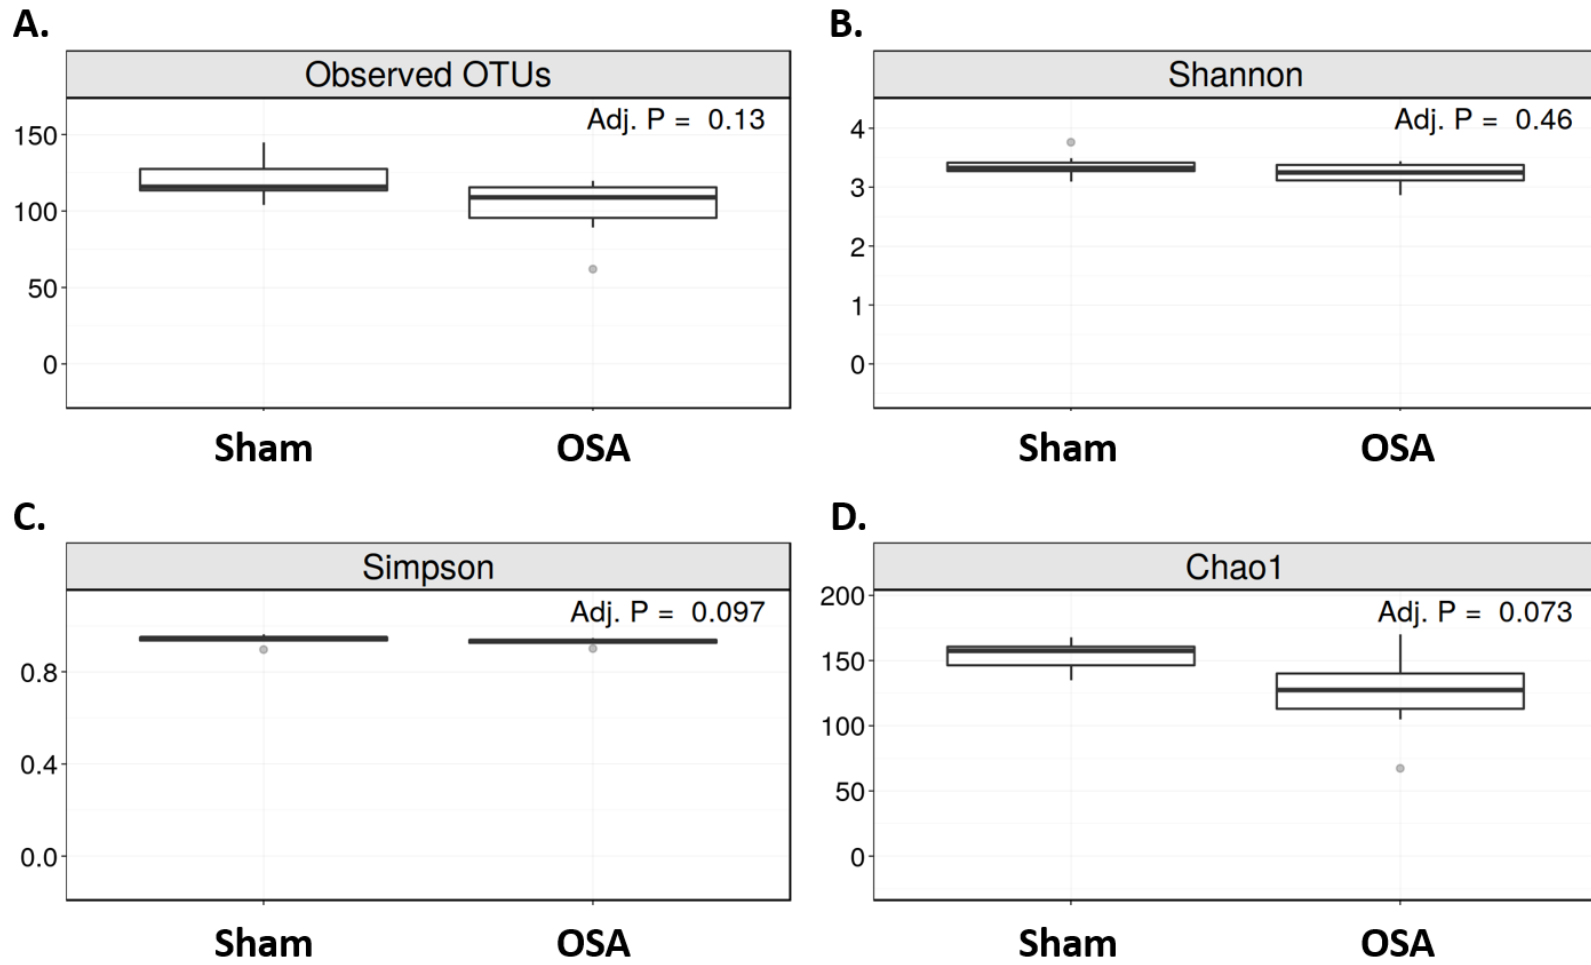

Following two weeks of sham or OSA, 16S rRNA sequencing of cecal content was performed. No significant differences were observed in measures of alpha diversity, including observed OTUs (A), Shannon diversity (B), Simpson diversity (C), or Chao 1 (D). n=6-7 per group. OSA: obstructive sleep apnea, OTU: operational taxonomic unit.

**Figure S2. Inflammatory response to OSA in mesenteric lymph node, spleen, and aorta.**

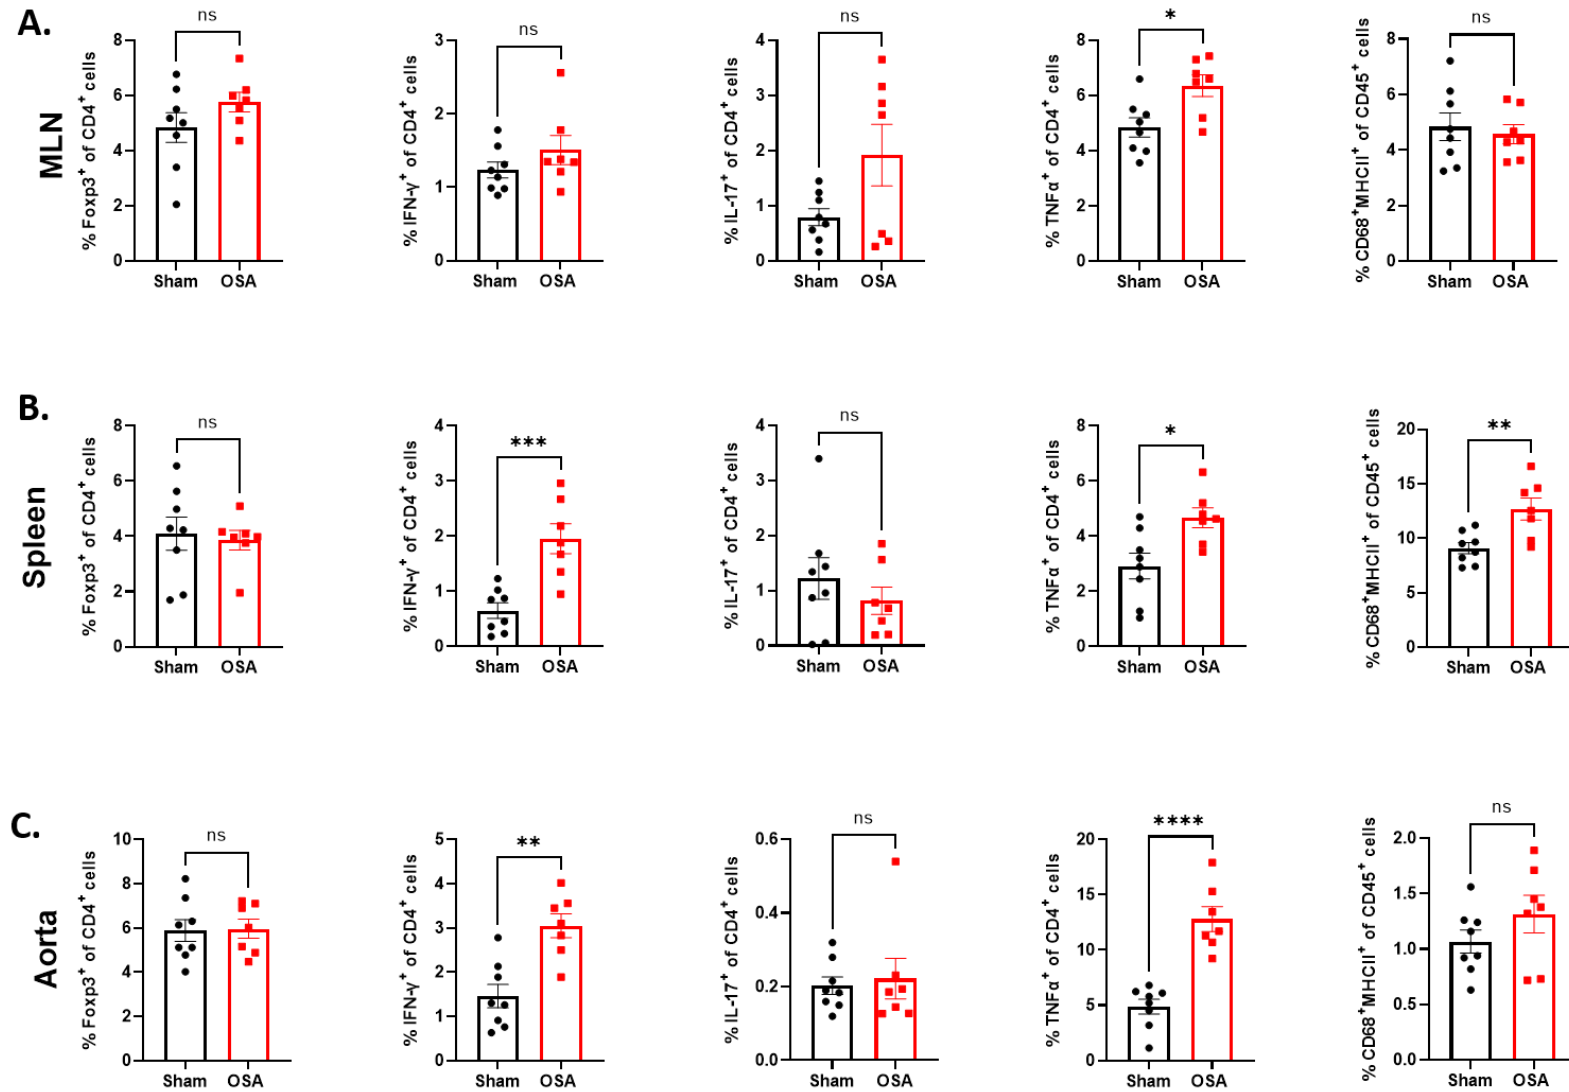

Effects of OSA on Tregs, T<sub>H</sub>1, T<sub>H</sub>17, TNFα<sup>+</sup>, and macrophages in MLN (A) spleen (B), and aorta (C). n=8 and 7 in sham and OSA, respectively; \*p<0.05, \*\*p<0.005, \*\*\*p<0.001, \*\*\*\*p<0.0001 using two-tailed Student's t-test. Error bars represent ± SEM. OSA: obstructive sleep apnea, MLN: mesenteric lymph node.

**Figure S3. Effect of IL-17a neutralization and OSA on inflammation in MLN, spleen, and aorta.**

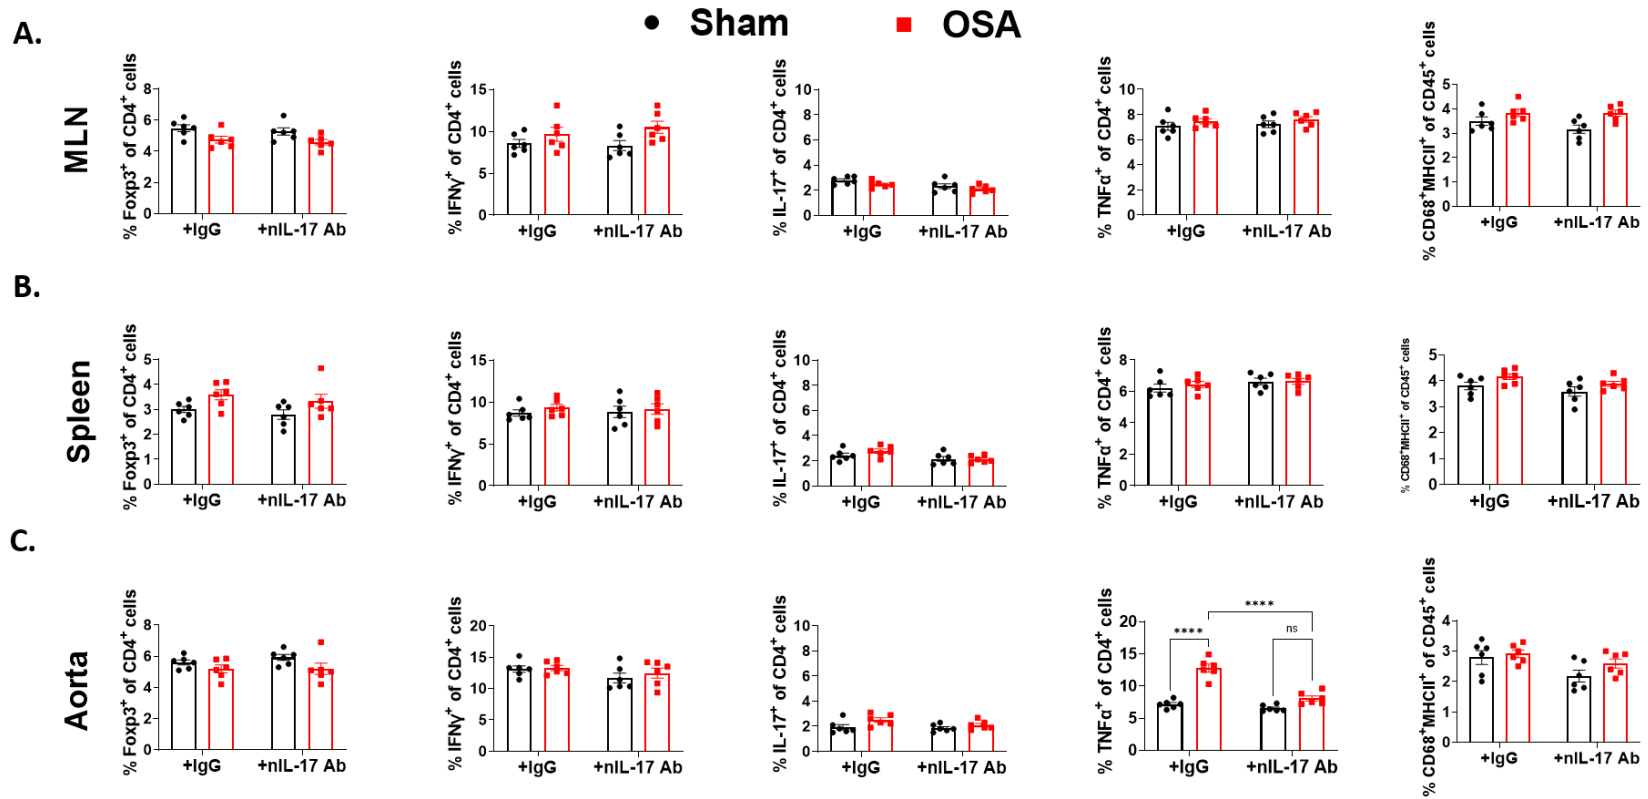

Effects of IL-17a neutralization on Tregs, T<sub>H</sub>1, T<sub>H</sub>17, TNF $\alpha$ <sup>+</sup>, and macrophages in MLN (A) spleen (B), and aorta (C) of sham and OSA rats. n=6; \*\*\*\*p<0.0001 using two-way ANOVA with Tukey's multiple comparisons test. Error bars represent  $\pm$  SEM. OSA: obstructive sleep apnea, MLN: mesenteric lymph node.
